# Supplementary material for: Molecular Detection of Pentastiridius leporinus, the Main Vector of the Syndrome ‘Basses Richesses’ in Sugar Beet
Source: MDPI journal article supplement (doi:10.3390/insects13110992), 2022-10-28
Supplement: s1 [file s1]

Supplementary information for the manuscript

**Molecular detection of *Pentastiridius leporinus*, the main vector of the syndrome 'basses richesses' in sugar beet**

Author information

René Pfitzer<sup>1,2,\*</sup>, Mark Varrelmann<sup>1</sup>, Georgia Hesse<sup>1</sup>, Omid Eini<sup>1,\*</sup>

<sup>1</sup>Institute of Sugar Beet Research, Holtenser Landstraße 77, 37079 Göttingen, Germany; varrelmann@ifz-goettingen.de (M.V.), hesse@ifz-goettingen.de (G.H.)

Agricultural Entomology, Department of Crop Sciences, Faculty of Agricultural Sciences, University of Göttingen  
Grisebachstrasse 6, 37077 Göttingen, Germany

\*Correspondence: pfitzer@ifz-goettingen.de (R.P.); eini@ifz-goettingen.de (O.E.); Tel.: +49 (0) 551 505 62 24

Tables S1, S2; Figures S1, S2, S3, S4.

Table S1. Table of experimental samples.

| Shown in... | No. | Species                         | Sex/stage     | Collection time | Collection site | Collection method       | DNA preparation |
|-------------|-----|---------------------------------|---------------|-----------------|-----------------|-------------------------|-----------------|
| Fig. 4 (1)  | 1   | <i>Pentastiridius leporinus</i> | Adult male    | 20.06.2020      | Untereisesheim  | Sweep net               | DNeasy kit      |
| Fig. 4 (1)  | 2   | <i>Pentastiridius leporinus</i> | Adult male    | 20.06.2020      | Untereisesheim  | Sweep net               | DNeasy kit      |
| Fig. 4 (1)  | 3   | <i>Pentastiridius leporinus</i> | Adult female  | 20.06.2020      | Untereisesheim  | Sweep net               | DNeasy kit      |
| Fig. 4 (1)  | 4   | <i>Pentastiridius leporinus</i> | Adult female  | 20.06.2020      | Untereisesheim  | Sweep net               | DNeasy kit      |
| Fig. 4 (1)  | 5   | <i>Reptalus quinquecostatus</i> | Adult male    | 20.07.2020      | Untereisesheim  | Sweep net               | DNeasy kit      |
| Fig. 4 (1)  | 6   | <i>Reptalus quinquecostatus</i> | Adult male    | 04.07.2020      | Grombach        | Sweep net               | DNeasy kit      |
| Fig. 4 (1)  | 7   | <i>Reptalus quinquecostatus</i> | Adult female  | 04.07.2020      | Untereisesheim  | Sweep net               | DNeasy kit      |
| Fig. 4 (1)  | 8   | <i>Reptalus quinquecostatus</i> | Adult female  | 04.07.2020      | Untereisesheim  | Sweep net               | DNeasy kit      |
| Fig. 4 (1)  | 9   | <i>Hyalesthes obsoletus</i>     | Adult male    | 22.07.2020      | Untereisesheim  | Sweep net               | DNeasy kit      |
| Fig. 4 (1)  | 10  | <i>Hyalesthes obsoletus</i>     | Adult male    | 2021            | Rheinland Pfalz | Sweep net               | DNeasy kit      |
| Fig. 4 (1)  | 11  | <i>Hyalesthes obsoletus</i>     | Adult female  | 20.07.2020      | Heidelberg      | Sweep net               | DNeasy kit      |
| Fig. 4 (1)  | 12  | <i>Hyalesthes obsoletus</i>     | Adult female  | 22.07.2020      | Untereisesheim  | Sweep net               | DNeasy kit      |
| Fig. 4 (2)  | 1   | <i>Pentastiridius leporinus</i> | Adult male    | 22.06.2020      | Untereisesheim  | Sticky trap (long term) | DNeasy kit      |
| Fig. 4 (2)  | 2   | <i>Pentastiridius leporinus</i> | Adult male    | 22.06.2020      | Untereisesheim  | Sticky trap (long term) | DNeasy kit      |
| Fig. 4 (2)  | 3   | <i>Pentastiridius leporinus</i> | Adult female  | 22.06.2020      | Bad Rappenau    | Sticky trap (long term) | DNeasy kit      |
| Fig. 4 (2)  | 4   | <i>Pentastiridius leporinus</i> | Adult female  | 06.07.2020      | Heilbronn       | Sticky trap (long term) | DNeasy kit      |
| Fig. 4 (2)  | 5   | <i>Reptalus quinquecostatus</i> | Adult male    | 22.07.2020      | Untereisesheim  | Sticky trap (long term) | DNeasy kit      |
| Fig. 4 (2)  | 6   | <i>Reptalus quinquecostatus</i> | Adult male    | 22.07.2020      | Untereisesheim  | Sticky trap (long term) | DNeasy kit      |
| Fig. 4 (2)  | 7   | <i>Reptalus quinquecostatus</i> | Adult female  | 22.07.2020      | Untereisesheim  | Sticky trap (long term) | DNeasy kit      |
| Fig. 4 (2)  | 8   | <i>Reptalus quinquecostatus</i> | Adult female  | 06.07.2020      | Heidelberg      | Sticky trap (long term) | DNeasy kit      |
| Fig. 4 (2)  | 9   | <i>Hyalesthes obsoletus</i>     | Adult male    | 22.07.2020      | Untereisesheim  | Sticky trap (long term) | DNeasy kit      |
| Fig. 4 (2)  | 10  | <i>Hyalesthes obsoletus</i>     | Adult male    | 22.07.2020      | Untereisesheim  | Sticky trap (long term) | DNeasy kit      |
| Fig. 4 (2)  | 11  | <i>Hyalesthes obsoletus</i>     | Adult female  | 22.07.2020      | Untereisesheim  | Sticky trap (long term) | DNeasy kit      |
| Fig. 4 (2)  | 12  | <i>Hyalesthes obsoletus</i>     | Adult female  | 22.07.2020      | Untereisesheim  | Sticky trap (long term) | DNeasy kit      |
| Fig. 5 (1)  | 1   | <i>Pentastiridius leporinus</i> | Adult male    | 22.07.2020      | Untereisesheim  | Sweep net               | PBS             |
| Fig. 5 (1)  | 2   | <i>Pentastiridius leporinus</i> | Adult male    | 22.07.2020      | Untereisesheim  | Sweep net               | PBS             |
| Fig. 5 (1)  | 3   | <i>Pentastiridius leporinus</i> | Adult female  | 20.06.2020      | Untereisesheim  | Sweep net               | PBS             |
| Fig. 5 (1)  | 4   | <i>Pentastiridius leporinus</i> | Adult female  | 20.06.2020      | Untereisesheim  | Sweep net               | PBS             |
| Fig. 5 (1)  | 5   | <i>Reptalus quinquecostatus</i> | Adult male    | 20.07.2020      | Heidelberg      | Sweep net               | PBS             |
| Fig. 5 (1)  | 6   | <i>Reptalus quinquecostatus</i> | Adult male    | 22.07.2020      | Untereisesheim  | Sweep net               | PBS             |
| Fig. 5 (1)  | 7   | <i>Reptalus quinquecostatus</i> | Adult female  | 22.07.2020      | Untereisesheim  | Sweep net               | PBS             |
| Fig. 5 (1)  | 8   | <i>Reptalus quinquecostatus</i> | Adult female  | 22.07.2020      | Untereisesheim  | Sweep net               | PBS             |
| Fig. 5 (1)  | 9   | <i>Hyalesthes obsoletus</i>     | Adult male    | 04.07.2020      | Untereisesheim  | Sweep net               | PBS             |
| Fig. 5 (1)  | 10  | <i>Hyalesthes obsoletus</i>     | Adult male    | 2021            | Rheinland Pfalz | Sweep net               | PBS             |
| Fig. 5 (1)  | 11  | <i>Hyalesthes obsoletus</i>     | Adult female  | 04.07.2020      | Untereisesheim  | Sweep net               | PBS             |
| Fig. 5 (1)  | 12  | <i>Hyalesthes obsoletus</i>     | Adult female  | 2021            | Rheinland Pfalz | Sweep net               | PBS             |
| Fig. 5 (2)  | 1   | <i>Pentastiridius leporinus</i> | Adult male    | 22.06.2020      | Untereisesheim  | Sticky trap (long term) | PBS             |
| Fig. 5 (2)  | 2   | <i>Pentastiridius leporinus</i> | Adult male    | 22.06.2020      | Untereisesheim  | Sticky trap (long term) | PBS             |
| Fig. 5 (2)  | 3   | <i>Pentastiridius leporinus</i> | Adult female  | 22.06.2020      | Untereisesheim  | Sticky trap (long term) | PBS             |
| Fig. 5 (2)  | 4   | <i>Pentastiridius leporinus</i> | Adult female  | 22.06.2020      | Dettenheim      | Sticky trap (long term) | PBS             |
| Fig. 5 (2)  | 5   | <i>Reptalus quinquecostatus</i> | Adult male    | 06.07.2020      | Heidelberg      | Sticky trap (long term) | PBS             |
| Fig. 5 (2)  | 6   | <i>Reptalus quinquecostatus</i> | Adult male    | 06.07.2020      | Heidelberg      | Sticky trap (long term) | PBS             |
| Fig. 5 (2)  | 7   | <i>Reptalus quinquecostatus</i> | Adult female  | 06.07.2020      | Heidelberg      | Sticky trap (long term) | PBS             |
| Fig. 5 (2)  | 8   | <i>Reptalus quinquecostatus</i> | Adult female  | 06.07.2020      | Heidelberg      | Sticky trap (long term) | PBS             |
| Fig. 5 (2)  | 9   | <i>Hyalesthes obsoletus</i>     | Adult male    | 20.08.2020      | Untereisesheim  | Sticky trap (long term) | PBS             |
| Fig. 5 (2)  | 10  | <i>Hyalesthes obsoletus</i>     | Adult male    | 22.07.2020      | Untereisesheim  | Sticky trap (long term) | PBS             |
| Fig. 5 (2)  | 11  | <i>Hyalesthes obsoletus</i>     | Adult female  | 13.07.2020      | Untereisesheim  | Sticky trap (long term) | PBS             |
| Fig. 5 (2)  | 12  | <i>Hyalesthes obsoletus</i>     | Adult female  | 22.07.2020      | Untereisesheim  | Sticky trap (long term) | PBS             |
| Fig. 6      | 1   | <i>Pentastiridius leporinus</i> | Egg           | 03.03.2022      | Lab. rearing    | Collection from rearing | PBS             |
| Fig. 6      | 2   | <i>Pentastiridius leporinus</i> | Egg           | 03.03.2022      | Lab. rearing    | Collection from rearing | PBS             |
| Fig. 6      | 3   | <i>Pentastiridius leporinus</i> | Egg           | 03.03.2022      | Lab. rearing    | Collection from rearing | PBS             |
| Fig. 6      | 4   | <i>Pentastiridius leporinus</i> | First instar  | 03.03.2022      | Lab. rearing    | Collection from rearing | PBS             |
| Fig. 6      | 5   | <i>Pentastiridius leporinus</i> | First instar  | 03.03.2022      | Lab. rearing    | Collection from rearing | PBS             |
| Fig. 6      | 6   | <i>Pentastiridius leporinus</i> | First instar  | 03.03.2022      | Lab. rearing    | Collection from rearing | PBS             |
| Fig. 6      | 7   | <i>Pentastiridius leporinus</i> | Second instar | 03.03.2022      | Lab. rearing    | Collection from rearing | PBS             |
| Fig. 6      | 8   | <i>Pentastiridius leporinus</i> | Second instar | 03.03.2022      | Lab. rearing    | Collection from rearing | PBS             |
| Fig. 6      | 9   | <i>Pentastiridius leporinus</i> | Second instar | 03.03.2022      | Lab. rearing    | Collection from rearing | PBS             |
| Fig. 6      | 10  | <i>Pentastiridius leporinus</i> | Third instar  | 03.03.2022      | Lab. rearing    | Collection from rearing | PBS             |
| Fig. 6      | 11  | <i>Pentastiridius leporinus</i> | Third instar  | 03.03.2022      | Lab. rearing    | Collection from rearing | PBS             |
| Fig. 6      | 12  | <i>Pentastiridius leporinus</i> | Third instar  | 03.03.2022      | Lab. rearing    | Collection from rearing | PBS             |
| Fig. 6      | 13  | <i>Pentastiridius leporinus</i> | Fourth instar | 03.03.2022      | Lab. rearing    | Collection from rearing | PBS             |
| Fig. 6      | 14  | <i>Pentastiridius leporinus</i> | Fourth instar | 03.03.2022      | Lab. rearing    | Collection from rearing | PBS             |
| Fig. 6      | 15  | <i>Pentastiridius leporinus</i> | Fourth instar | 03.03.2022      | Lab. rearing    | Collection from rearing | PBS             |
| Fig. 6      | 16  | <i>Pentastiridius leporinus</i> | Fifth instar  | 03.03.2022      | Lab. rearing    | Collection from rearing | PBS             |
| Fig. 6      | 17  | <i>Pentastiridius leporinus</i> | Fifth instar  | 03.03.2022      | Lab. rearing    | Collection from rearing | PBS             |
| Fig. 6      | 18  | <i>Pentastiridius leporinus</i> | Fifth instar  | 03.03.2022      | Lab. rearing    | Collection from rearing | PBS             |
| Fig. 6      | 19  | <i>Reptalus quinquecostatus</i> | Adult female  | 04.07.2020      | Untereisesheim  | Sweep net               | DNeasy kit      |
| Fig. 6      | 20  | <i>Hyalesthes obsoletus</i>     | Adult female  | 22.07.2020      | Untereisesheim  | Sweep net               | DNeasy kit      |

|         |    |                                 |            |            |              |                          |     |
|---------|----|---------------------------------|------------|------------|--------------|--------------------------|-----|
| Fig. S2 | 1  | <i>Empoasca pteridis</i>        | Adult male | 16.08.2018 | Heidelberg   | Sticky trap (short term) | PBS |
| Fig. S2 | 2  | <i>Empoasca pteridis</i>        | Adult male | 16.08.2018 | Heidelberg   | Sticky trap (short term) | PBS |
| Fig. S2 | 3  | <i>Empoasca pteridis</i>        | Adult male | 16.08.2018 | Heidelberg   | Sticky trap (short term) | PBS |
| Fig. S2 | 4  | <i>Empoasca affinis</i>         | Adult male | 23.08.2018 | Heidelberg   | Sticky trap (short term) | PBS |
| Fig. S2 | 5  | <i>Empoasca affinis</i>         | Adult male | 23.08.2018 | Bretten      | Sticky trap (short term) | PBS |
| Fig. S2 | 6  | <i>Empoasca affinis</i>         | Adult male | 23.08.2018 | Bad Rappenau | Sticky trap (short term) | PBS |
| Fig. S2 | 7  | <i>Cicadula placida</i>         | Adult male | 15.06.2018 | Heidelberg   | Sticky trap (short term) | PBS |
| Fig. S2 | 8  | <i>Cicadula placida</i>         | Adult male | 15.06.2018 | Heidelberg   | Sticky trap (short term) | PBS |
| Fig. S2 | 9  | <i>Cicadula placida</i>         | Adult male | 15.06.2018 | Bretten      | Sticky trap (short term) | PBS |
| Fig. S2 | 10 | <i>Orientus ishidae</i>         | Adult male | 10.08.2018 | Bretten      | Sticky trap (short term) | PBS |
| Fig. S2 | 11 | <i>Orientus ishidae</i>         | Adult male | 10.08.2018 | Bretten      | Sticky trap (short term) | PBS |
| Fig. S2 | 12 | <i>Orientus ishidae</i>         | Adult male | 10.08.2018 | Bretten      | Sticky trap (short term) | PBS |
| Fig. S2 | 13 | <i>Reptalus quinquecostatus</i> | Adult male | 20.07.2018 | Bretten      | Sticky trap (short term) | PBS |
| Fig. S2 | 14 | <i>Reptalus quinquecostatus</i> | Adult male | 27.07.2018 | Bretten      | Sticky trap (short term) | PBS |
| Fig. S2 | 15 | <i>Reptalus quinquecostatus</i> | Adult male | 27.07.2018 | Bretten      | Sticky trap (short term) | PBS |
| Fig. S3 | 1  | <i>Psammotettix alienus</i>     | Adult male | 23.08.2018 | Heidelberg   | Sticky trap (short term) | PBS |
| Fig. S3 | 2  | <i>Psammotettix alienus</i>     | Adult male | 23.08.2018 | Heidelberg   | Sticky trap (short term) | PBS |
| Fig. S3 | 3  | <i>Psammotettix alienus</i>     | Adult male | 23.08.2018 | Bretten      | Sticky trap (short term) | PBS |
| Fig. S3 | 4  | <i>Empoasca decipiens</i>       | Adult male | 23.08.2018 | Heidelberg   | Sticky trap (short term) | PBS |
| Fig. S3 | 5  | <i>Empoasca decipiens</i>       | Adult male | 23.08.2018 | Bad Rappenau | Sticky trap (short term) | PBS |
| Fig. S3 | 6  | <i>Empoasca decipiens</i>       | Adult male | 23.08.2018 | Bad Rappenau | Sticky trap (short term) | PBS |
| Fig. S3 | 7  | <i>Fieberiella florii</i>       | Adult male | 10.08.2018 | Bretten      | Sticky trap (short term) | PBS |
| Fig. S3 | 8  | <i>Fieberiella florii</i>       | Adult male | 10.08.2018 | Heidelberg   | Sticky trap (short term) | PBS |
| Fig. S3 | 9  | <i>Fieberiella florii</i>       | Adult male | 10.08.2018 | Bretten      | Sticky trap (short term) | PBS |
| Fig. S3 | 10 | <i>Javesella pellucida</i>      | Adult male | 29.06.2022 | Bad Rappenau | Sticky trap (short term) | PBS |
| Fig. S3 | 11 | <i>Javesella pellucida</i>      | Adult male | 29.06.2022 | Bad Rappenau | Sticky trap (short term) | PBS |
| Fig. S3 | 12 | <i>Javesella pellucida</i>      | Adult male | 29.06.2022 | Bad Rappenau | Sticky trap (short term) | PBS |
| Fig. S3 | 13 | <i>Stictocephala bisonia</i>    | Adult male | 23.08.2018 | Bretten      | Sticky trap (short term) | PBS |
| Fig. S3 | 14 | <i>Stictocephala bisonia</i>    | Adult male | 23.08.2018 | Heidelberg   | Sticky trap (short term) | PBS |
| Fig. S3 | 15 | <i>Stictocephala bisonia</i>    | Adult male | 23.08.2018 | Heidelberg   | Sticky trap (short term) | PBS |
| Fig. S3 | 16 | <i>Javesella obscurella</i>     | Adult male | 22.06.2018 | Bad Rappenau | Sticky trap (short term) | PBS |
| Fig. S3 | 17 | <i>Javesella obscurella</i>     | Adult male | 22.06.2018 | Bad Rappenau | Sticky trap (short term) | PBS |

**Table S2.** Evolutionary divergence between sequences of selected members of Cixiidae based on the partial *COI* sequence amplified from *P. leporinus* using specific primers in this study and *COI* sequences from NCBI database of closely related species from genus *Pentastiridius* and each three species from two taxonomically close genera *Reptalus* and *Hyalesthes*. The sequence obtained in this study is shown in bold. The specifically amplified *COI* fragment is shows that intraspecific genetic distance was lower than interspecific distance. *Catonia carolina* from the Achilidae family and *Tettigometra virescens* from the Tettigometridae family were used as outgroups.

|                                              | 1:    | 2:    | 3:    | 4:    | 5:    | 6:    | 7:    | 8:    | 9:    | 10:   | 11:   | 12:   | 13: |
|----------------------------------------------|-------|-------|-------|-------|-------|-------|-------|-------|-------|-------|-------|-------|-----|
| 1: ON094072- <i>Pentastiridius leporinus</i> |       |       |       |       |       |       |       |       |       |       |       |       |     |
| 2: FN179288- <i>Pentastiridius leporinus</i> | 0.000 |       |       |       |       |       |       |       |       |       |       |       |     |
| 3: FN179289- <i>Pentastiridius leporinus</i> | 0.006 | 0.003 |       |       |       |       |       |       |       |       |       |       |     |
| 4: FN179290- <i>Pentastiridius beieri</i>    | 0.051 | 0.060 | 0.060 |       |       |       |       |       |       |       |       |       |     |
| 5: GQ397853- <i>Reptalus cuspidata</i>       | 0.119 | 0.117 | 0.113 | 0.116 |       |       |       |       |       |       |       |       |     |
| 6: GQ397855- <i>Reptalus melanochaetus</i>   | 0.096 | 0.100 | 0.094 | 0.107 | 0.097 |       |       |       |       |       |       |       |     |
| 7: GQ397852- <i>Reptalus quinquecostatus</i> | 0.104 | 0.117 | 0.115 | 0.121 | 0.115 | 0.090 |       |       |       |       |       |       |     |
| 8: GQ397854- <i>Reptalus panzeri</i>         | 0.108 | 0.126 | 0.120 | 0.125 | 0.122 | 0.098 | 0.091 |       |       |       |       |       |     |
| 9: GU553002- <i>Hyalesthes obsoletus</i>     | 0.134 | 0.140 | 0.133 | 0.135 | 0.144 | 0.125 | 0.137 | 0.137 |       |       |       |       |     |
| 10: GU553003- <i>Hyalesthes luteipes</i>     | 0.162 | 0.169 | 0.164 | 0.157 | 0.157 | 0.146 | 0.146 | 0.131 | 0.125 |       |       |       |     |
| 11: FN428805- <i>Hyalesthes scotti</i>       | 0.166 | 0.172 | 0.171 | 0.159 | 0.174 | 0.165 | 0.173 | 0.140 | 0.126 | 0.064 |       |       |     |
| 12: JQ982584- <i>Catonia carolina</i>        | 0.229 | 0.247 | 0.227 | 0.245 | 0.257 | 0.227 | 0.219 | 0.242 | 0.236 | 0.262 | 0.245 |       |     |
| 13: MK188587- <i>Tettigometra virescens</i>  | 0.741 | 0.769 | 0.771 | 0.766 | 0.792 | 0.775 | 0.756 | 0.759 | 0.679 | 0.735 | 0.726 | 0.753 |     |



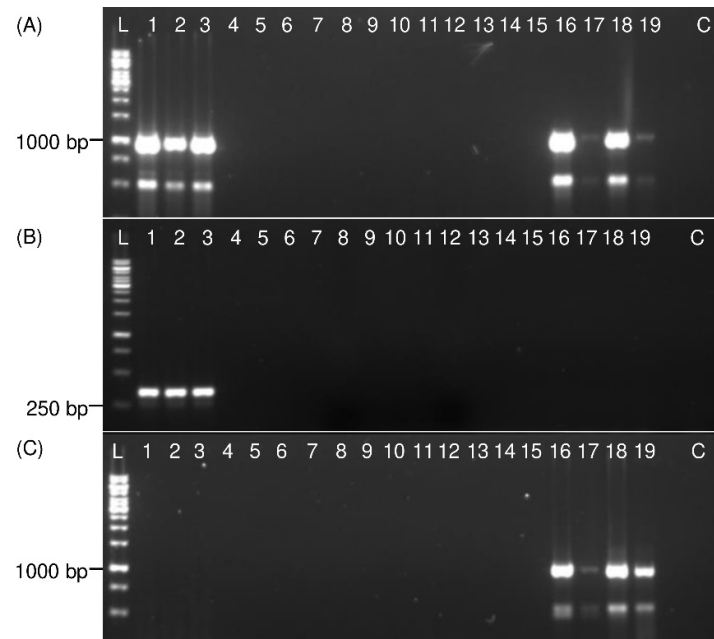

**Figure S2.** Electrophoretic patterns of PCR products show the specific detection of *P. leporinus*. Male adult insects were grinded in PBS for DNA template preparation. The insects were collected from sticky traps and stored on sticky traps for 1-2 weeks before use. In panel A, universal Ron and Calvin primers, in panel B, specific *P. leporinus* primers and in panel C, universal UEA3 and UEA8 primers were used for PCR assay. Lanes 1-3 represent *P. leporinus*; 4-6 *E. pteridis*; 7-9 *E. affinis*; 10-12 *C. placida*; 13-15 *O. ishidae*; 16-18 *R. quinquecostatus*, 19 *H. obsoletus* (after sweep net collection, control); C: Negative control (water). The sizes of amplicons are shown on the left side and compared with 1 kb ladder (L).

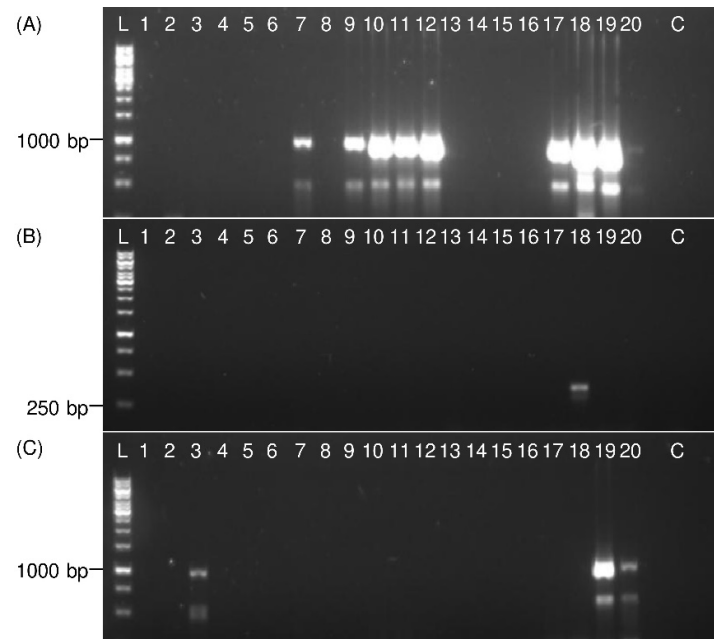

**Figure S3.** Electrophoretic patterns of PCR products show the specific detection of *P. leporinus*. Male adult insects were grinded in PBS for DNA template preparation. The insects were collected from sticky traps and stored on sticky traps for 1-2 weeks before use. In panel A, universal Ron and Calvin primers, in panel B, specific *P. leporinus* primers and in panel C, universal UEA3 and UEA8 primers were used for PCR assay. Lanes 1-3 represent *P. alienus*; 4-6 *E. decipiens*; 7-9 *F. florii*; 10-12 *J. pellucida*; 13-15 *S. bisonia*; 16-17 *J. obscurella*; 18 *P. leporinus* (control); 19 *R. quinquecostatus* (control); 20 *H. obsoletus* (after sweep net collection, control); C: Negative control (water). The sizes of amplicons are shown on the left side and compared with 1 kb ladder (L).

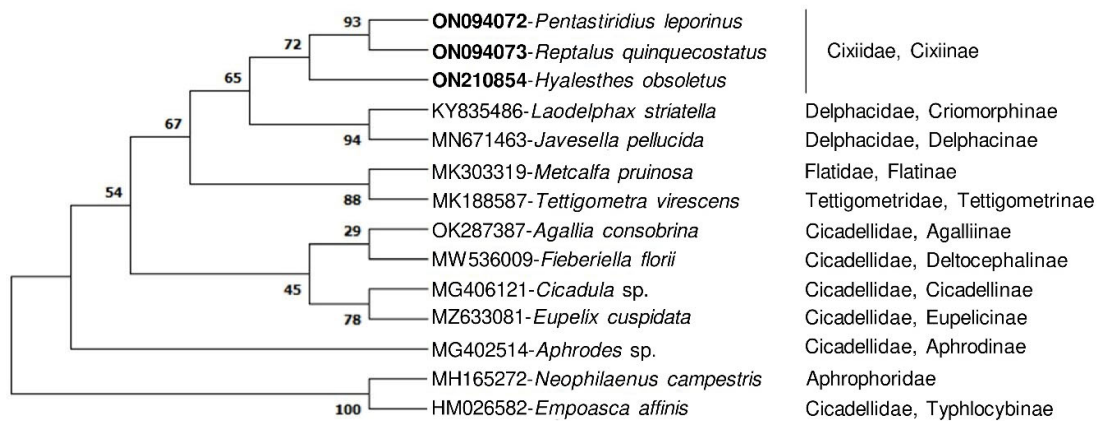

**Figure S4.** Evolutionary relationships of selected members of Cixiidae (*P. leporinus*, *R. quinquecostatus*, and *H. obsoletus*) using the sequences of *COI* gene that were PCR amplified with universal primers (Ron and Calvin; UEA3 and UEA8) in this study compared to the available sequences from NCBI database of representative members of all Auchenorrhyncha families and subfamilies reported from sugar beet fields. The sequences from this study are shown in bold. The percentage of replicate trees in which the associated taxa clustered together in the bootstrap test (1000 replicates) are shown next to the branches. The obtained *COI* fragments were useful to clearly differentiate *P. leporinus*, *R. quinquecostatus*, and *H. obsoletus* from other taxonomically close and far species.
